# Supplementary material
Source: HighWire-hosted journal article supplement (https://cmajopen.ca/highwire/filestream/89731/field_highwire_adjunct_files/1/open-2022-0197-2-at.pdf)
Supplement: open-2022-0197-2-at.pdf [file open-2022-0197-2-at.pdf]

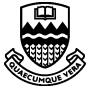

**DEMOGRAPHIC FORM**

**Study Title: COVID-19 Online Disinformation among Black Canadians**

1. What country were you born? \_\_\_\_\_
2. What city are you located in Canada? \_\_\_\_\_
3. What is your gender?  
a) Male                      b) Female                      c) Other (please specify) \_\_\_\_\_
4. What is your age? \_\_\_\_\_
5. What is your religion?  
a) Christian                      b) Muslim                      c) Other (please specify) \_\_\_\_\_
6. What is your COVID-19 vaccination status?  
a) Fully Immunized    b) Not immunized                      c) Other (please specify) \_\_\_\_\_
7. What is your current occupation and/or role within the Black Community in Canada?  
\_\_\_\_\_

**IDENTIFICATION NUMBER:** \_\_\_\_\_
